# Supplementary material for: Preparation of ZnO nanoparticle loaded amidoximated wool fibers as a promising antibiofouling adsorbent for uranium(vi) recovery
Source: Royal Society of Chemistry journal article supplement (doi:10.1039/c9ra03777b), 2019-01-01
Supplement: c9ra03777b1.pdf [file c9ra03777b1.pdf]

---

*Supporting information of*

**Preparation of ZnO nanoparticles loaded amidoximated wool fibers  
as a promising antibiofouling adsorbent for uranium(VI) recovery**

Haichuan Ma<sup>a</sup>, Fan Zhang<sup>a,b</sup>, Qiaoyu Li<sup>a</sup>, Guobing Chen<sup>a</sup>, Sheng Hu<sup>b</sup>, Haiming Cheng<sup>a,c\*</sup>

*a. The Key Laboratory of Leather Chemistry and Engineering of Ministry of  
Education, Sichuan University, Chengdu 610065, China*

*b. Institute of Nuclear Physics and Chemistry, China Academy of Engineering  
physics, Mianyang 621900, Sichuan, China*

*c. National Engineering Laboratory for Clean Technology of Leather  
Manufacture, Sichuan University, Chengdu 610065, Sichuan, China*

**Table S1** Typical adsorption isotherms, kinetics models equations investigated in the present work<sup>[1-3]</sup>.

| Model                     | Equation                                                     |
|---------------------------|--------------------------------------------------------------|
| Langmuir isotherm         | $C_e / q_e = 1 / K_L q_m + C_e / q_m$                        |
| Freundlich isotherm       | $\ln q_e = \ln K_F + \ln C_e / n$                            |
| Pseudo-first-order model  | $1 / q_t = 1 / (q_e t) + 1 / q_e$                            |
| Pseudo-second-order model | $t / q_t = 1 / (k_2 q_e^2) + t / q_e$                        |
| Elovich model             | $q_t = \frac{\ln \alpha \beta}{\beta} + \frac{\ln t}{\beta}$ |

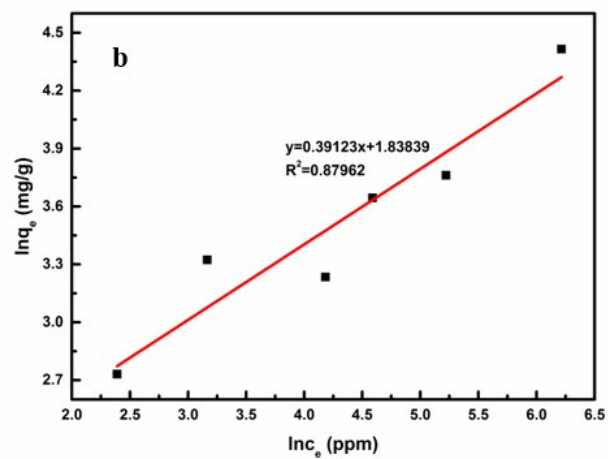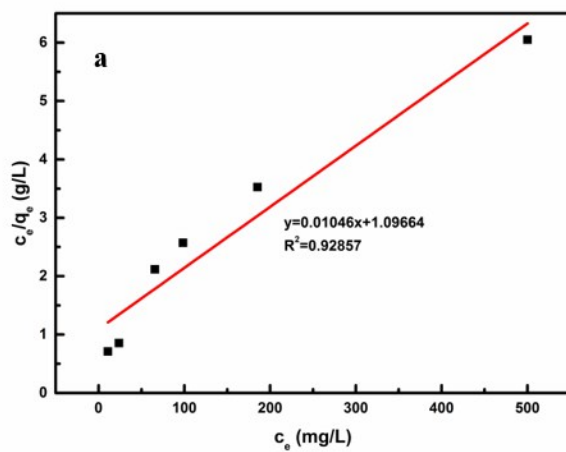

Figure.S1 Adsorption isotherms: (a) Langmuir model; (b) Freundlich model. Conditions: pH = 8.0, T = 25 °C, Time = 10 h.

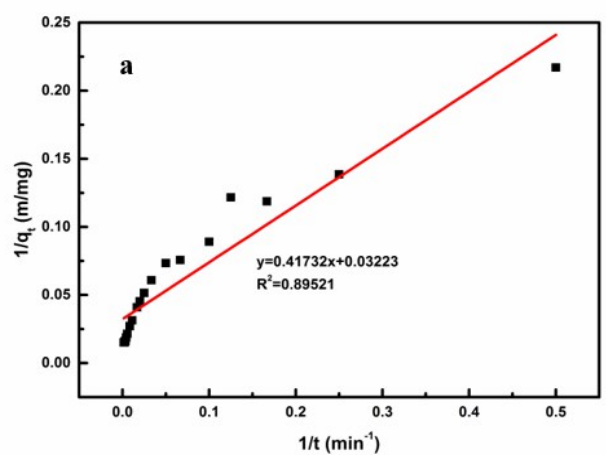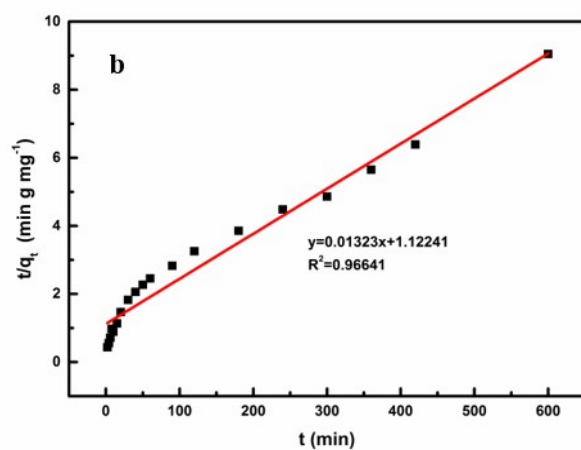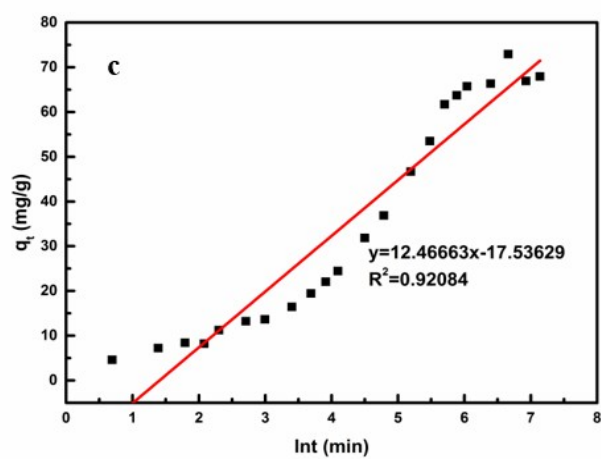

Figure.S2 Absorption kinetics: (a) Pseudo first order model; (b) Pseudo second order model; and (c) Elovich equation. Conditions: pH = 8.0, T = 25 °C, Time = 10 h.

---

## References

1. Langmuir, I. The adsorption of gases on plane surfaces of glass, mica and platinum. *J. Am. Chem. Soc.* **1918**, *40*, 1361-1403.
2. Freundlich, H. Over the adsorption in solution. *J. Phys. Chem.* **1906**, *57*, 1100-1107.
3. Lagergren, S. Zur theorie der sogenannten adsorption gelosterstoffe, Kungliga Svenska Vetenskapsakademiens. *Handlingar.* **1898**, *24*,1-39.
4. Ho, Y. S. Review of second-order models for adsorption systems. *J. Hazard. Mater.* **2006**, *136*, 681-689.
